# Supplementary material for: Direct electrospinning of titania nanofibers with ethanol
Source: Royal Society of Chemistry journal article supplement (doi:10.1039/c9dt01872g), 2019-01-01
Supplement: c9dt01872g1.pdf [file c9dt01872g1.pdf]

**Electronic Supplementary Information:**

**Direct electrospinning of titania nanofibers with ethanol**

**Brian S. Chapman, Sumeet R. Mishra and Joseph B. Tracy\***

Department of Materials Science and Engineering, North Carolina State University, Raleigh,  
North Carolina 27695, USA

## Supplementary Figures

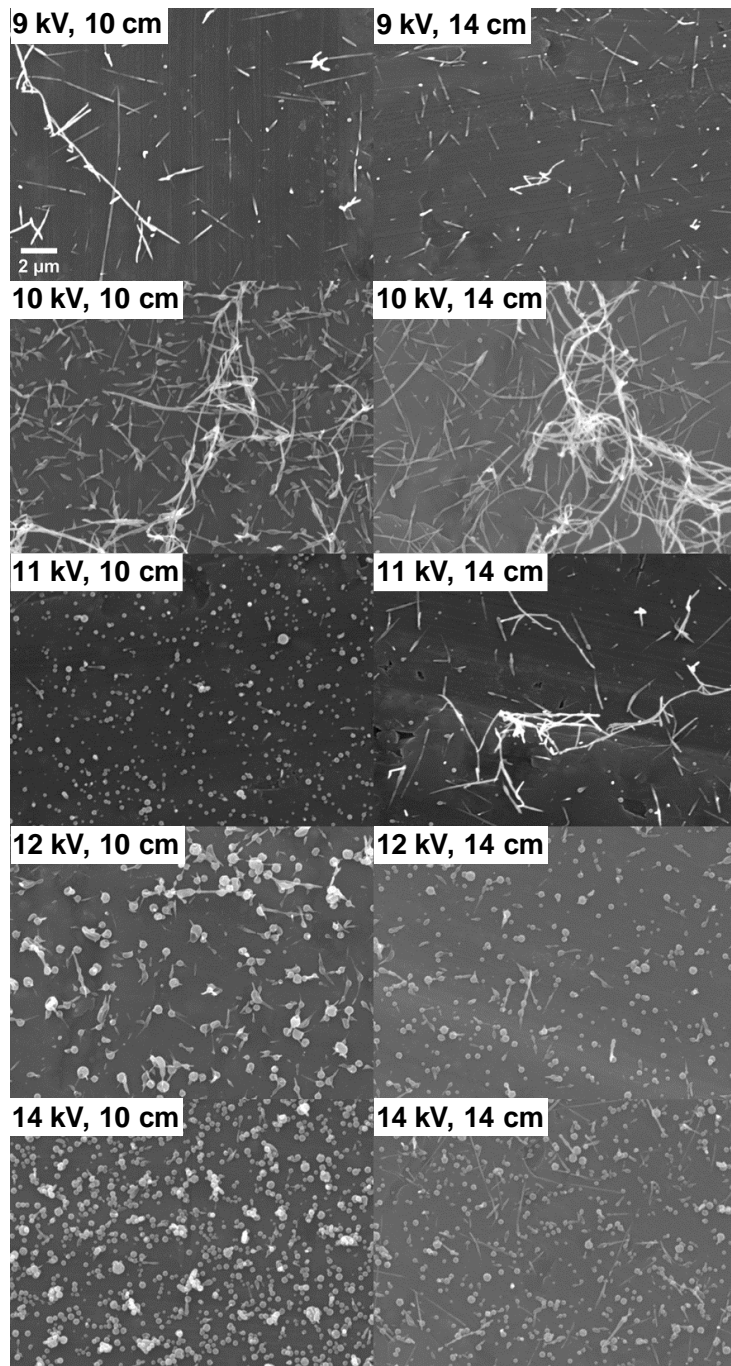

**Figure S1.** Scanning electron microscopy images with a common scale bar of the products of electrospray and electrospinning of a  $\text{TiO}_2$  sol, prepared in a different batch than the results reported in the main text, at a flow rate of  $0.6 \mu\text{L}/\text{min}$ . Variation of the applied voltage and tip-collector distance allows optimization of electrospinning, which was at 10 kV and 14 cm for this sample.
